# Supplementary material for: Influence of the PHY domain on the ms-photoconversion dynamics of a knotless phytochrome
Source: Springer Nature journal article supplement (doi:10.1007/s43630-022-00245-9), 2022-06-10
Supplement: MOESM1 [file 43630_2022_245_MOESM1_ESM.pdf]

## Supplementary Information

# Influence of the PHY Domain on the *ms*-Photoconversion Dynamics of a Knotless Phytochrome

Tobias Fischer<sup>1</sup>, Lisa Köhler<sup>2</sup>, Tanja Ott<sup>1</sup>, Chen Song<sup>2</sup>, Josef Wachtveitl<sup>1,\*</sup> and Chavdar Slavov<sup>1,\*</sup>

<sup>1</sup> Institute of Physical and Theoretical Chemistry, Goethe University Frankfurt am Main, Max-von-Laue-Straße 7, 60438 Frankfurt, Germany, [fischer@theochem.uni-frankfurt.de](mailto:fischer@theochem.uni-frankfurt.de), [ott@chemie.uni-frankfurt.de](mailto:ott@chemie.uni-frankfurt.de), [wveitl@theochem.uni-frankfurt.de](mailto:wveitl@theochem.uni-frankfurt.de), [chslavov@theochem.uni-frankfurt.de](mailto:chslavov@theochem.uni-frankfurt.de)

<sup>2</sup> Institute for Analytical Chemistry, University of Leipzig, Linnéstraße 3, 04103 Leipzig, Germany, [l.koehler@uni-leipzig.de](mailto:l.koehler@uni-leipzig.de), [chen.song@uni-leipzig.de](mailto:chen.song@uni-leipzig.de)

\* Correspondence: C.S. [chslavov@theochem.uni-frankfurt.de](mailto:chslavov@theochem.uni-frankfurt.de), J.W. [wveitl@theochem.uni-frankfurt.de](mailto:wveitl@theochem.uni-frankfurt.de)

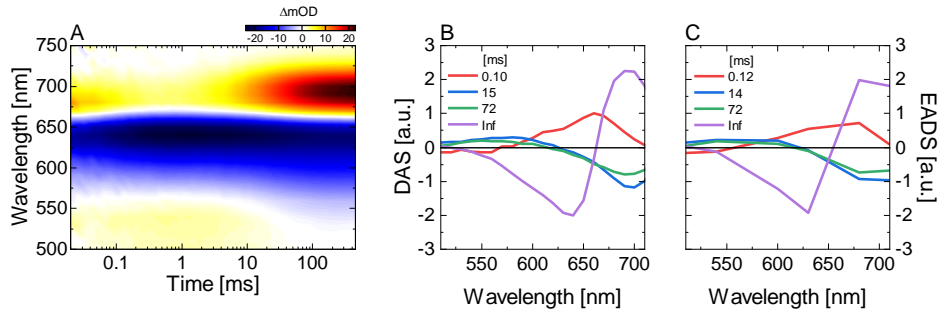

**Fig. S1**  $P_r \rightarrow P_{fr}$  ms dynamics of All2699g1 at pH 7.2. (A) Flash photolysis data of the  $P_r \rightarrow P_{fr}$  ms dynamics after excitation at 640 nm. (B) Corresponding decay-associated spectra (DAS) obtained after global target analysis of (A). (C) DAS obtained from global target analysis of a separate measurement of single transients at key wavelengths (510, 540, 600, 630, 680 and 710 nm) under similar conditions

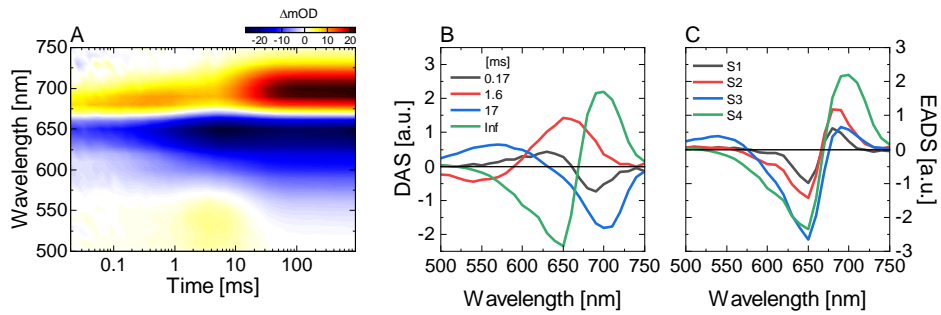

**Fig. S2**  $P_r \rightarrow P_{fr}$  ms dynamics of SynCph2 at pH 8. (A) Flash photolysis data of the  $P_r \rightarrow P_{fr}$  ms dynamics after excitation at 640 nm. (B) Corresponding decay-associated spectra (DAS) and (C) evolution-associated spectra (EADS) obtained after global target analysis of (A)
